# Supplementary material for: Anti-Inflammatory Effects of Fermented Lotus Root and Linoleic Acid in Lipopolysaccharide-Induced RAW 264.7 Cells
Source: MDPI journal article supplement (doi:10.3390/life10110293), 2020-11-19
Supplement: s1 [file s1]

# Anti-Inflammatory Effects of Fermented Lotus Root and Linoleic Acid in Lipopolysaccharide-Induced RAW 264.7 Cells

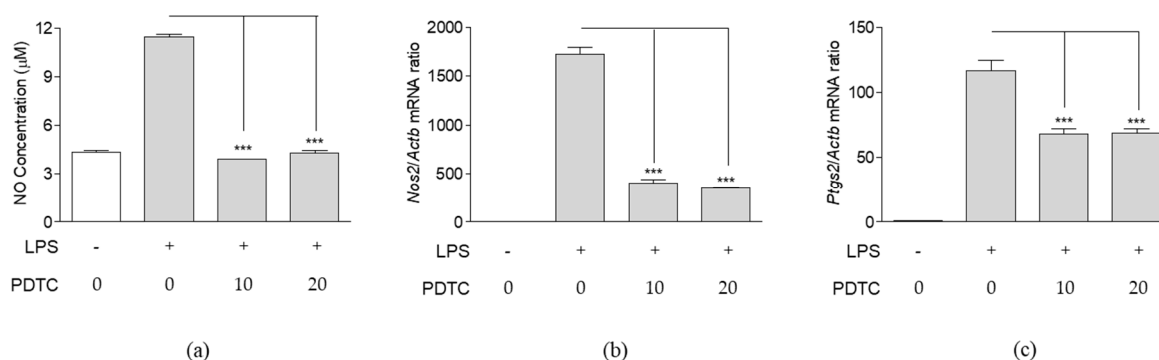

**Figure 1.** Effects of PDTC on LPS-induced NO production and related gene expression in RAW 264.7 cells. RAW 264.7 cells were co-treated with LPS (1 μg/mL) and PDTC (10 or 20 μM) for 24 h. (a) NO production in culture medium. mRNA expression of (b) *Nos2* and (c) *Ptgs2* quantified by RT-PCR. The data represent mean ± SEM. \*\*\* $p < 0.001$  compared to LPS-only treated group.

**Publisher's Note:** MDPI stays neutral with regard to jurisdictional claims in published maps and institutional affiliations.

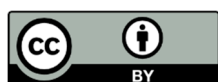

© 2020 by the authors. Submitted for possible open access publication under the terms and conditions of the Creative Commons Attribution (CC BY) license (<http://creativecommons.org/licenses/by/4.0/>).
